# Supplementary material for: Impact of Dry Processing on Secondary Metabolites in the Petals of Marigold (Tagetes spp.) Cultivar
Source: MDPI journal article supplement (doi:10.3390/horticulturae10040382), 2024-04-09
Supplement: s1 [file s1]

# Supplementary data

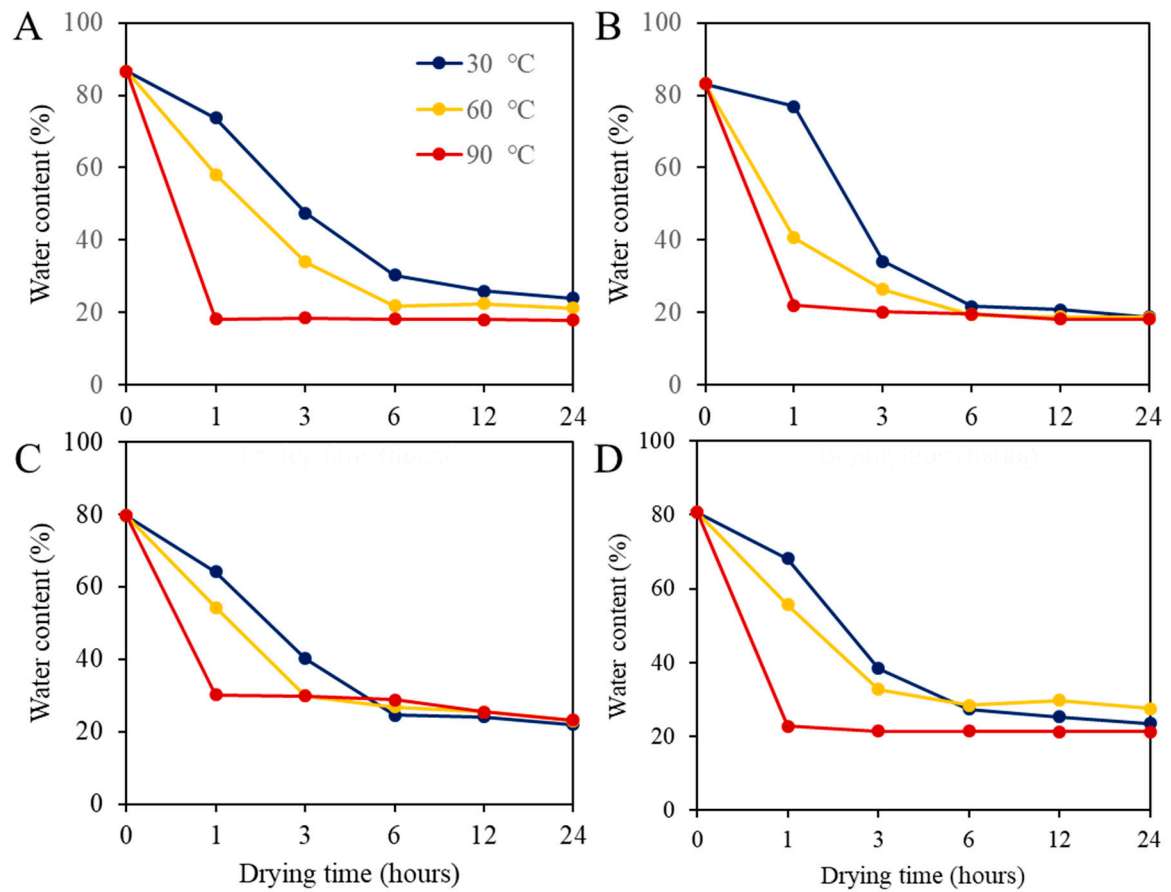

**Figure S1.** Changes of relative water contents of four marigold cultivars during dry processing. A-D indicate DY (Durango yellow), DO (Durango orange), IY (Inca yellow), and IO (Inca orange), respectively.

**Supplementary Table 1.** The EC<sub>50</sub> (mg·mL<sup>-1</sup>) for the antioxidant activity in marigold petals dried at different temperatures.

| Dry<br>processing | DPPH radical scavenging activity |             |             |             | ABTS radical scavenging activity |             |             |             |
|-------------------|----------------------------------|-------------|-------------|-------------|----------------------------------|-------------|-------------|-------------|
|                   | DY                               | DO          | IY          | IO          | DY                               | DO          | IY          | IO          |
| FD                | 2.64 ± 0.06                      | 2.18 ± 0.04 | 1.94 ± 0.07 | 1.53 ± 0.03 | 0.67 ± 0.01                      | 0.60 ± 0.01 | 0.65 ± 0.01 | 0.56 ± 0.00 |
| 30 °C             | 2.47 ± 0.06                      | 2.26 ± 0.04 | 1.63 ± 0.03 | 1.31 ± 0.04 | 0.67 ± 0.01                      | 0.67 ± 0.01 | 0.69 ± 0.00 | 0.58 ± 0.00 |
| 60 °C             | 2.44 ± 0.11                      | 2.23 ± 0.09 | 1.63 ± 0.05 | 1.31 ± 0.02 | 0.68 ± 0.01                      | 0.66 ± 0.01 | 0.71 ± 0.01 | 0.60 ± 0.00 |
| 90 °C             | 2.51 ± 0.09                      | 2.23 ± 0.02 | 1.51 ± 0.03 | 1.28 ± 0.01 | 0.63 ± 0.03                      | 0.62 ± 0.00 | 0.66 ± 0.00 | 0.62 ± 0.02 |

All data expressed as mean ± standard error of three replicates. FD; Freeze dried, DY; Durango yellow, DO; Durango orange, IY; Inca yellow, IO; Inca orange.
